# Supplementary material for: Exploring the Dynamic Invasion Pattern of the Black-Headed Fall Webworm in China: Susceptibility to Topography, Vegetation, and Human Activities
Source: MDPI journal article supplement (doi:10.3390/insects15050349), 2024-05-13

**Figure S1.** Spatial distribution map of land cover types at FWW sites in China. The “Non-forested area” were 6-14 and 16 of the 17 types defined by International Geosphere-Biosphere Programme (IGBP) in MCD12Q1\_V61 products. The “Forest area” were 1-5 of the 17 types defined by IGBP in MCD12Q1\_V61 products. The “Water area” were 15 and 17 of the 17 types defined by IGBP in MCD12Q1\_V61 products.

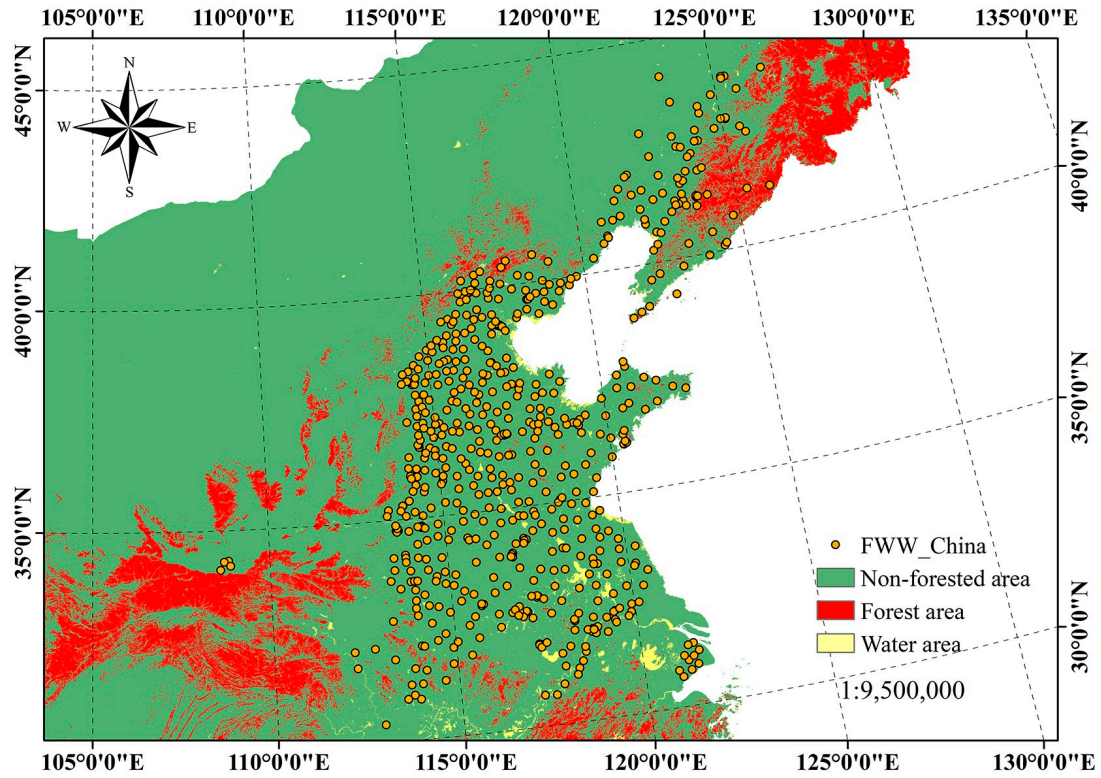

Supplement: s1 [file s1]
